# Supplementary material for: Analysis of Autozygosity Using Whole-Genome Sequence Data of Full-Sib Families in Pikeperch (Sander lucioperca)
Source: PubMed Central journal article supplement (PMC8801746; doi:10.3389/fgene.2021.786934), 2022-01-17
Supplement: Table1.pdf [file Table1.pdf]

## Supplementary Material

**Table S1.** Descriptive statistics of runs of homozygosity (ROH) and autozygosity contributions for the different age-related homozygous-by-descent (HBD) classes with pre-defined rates of ancestry change ( $R_k$ ) for progeny and parents. cM, centiMorgan; CUM, cumulative autozygosity.

| Generation | HBD class ( $R_k$ ) | Age of inbreeding event ( $\approx R_k / 2$ ) | Number of ROH | No. of individuals with $\geq 1$ ROH | Number of SNPs |        |       | Length (cM)           |       |       | Proportion of genome in HBD class |                       |                       |                       |
|------------|---------------------|-----------------------------------------------|---------------|--------------------------------------|----------------|--------|-------|-----------------------|-------|-------|-----------------------------------|-----------------------|-----------------------|-----------------------|
|            |                     |                                               |               |                                      | Min            | Max    | Mean  | Min                   | Max   | Mean  | Min                               | Max                   | Mean                  | CUM                   |
| Progeny    | 7                   | 3.5                                           | 3,842         | 160                                  | 384            | 28,236 | 5,450 | 1.33                  | 75.78 | 23.00 | $8.97 \times 10^{-7}$             | $3.19 \times 10^{-1}$ | $5.86 \times 10^{-2}$ | $5.86 \times 10^{-2}$ |
|            | 49                  | 24.5                                          | 47,464        | 363                                  | 9              | 6,746  | 1,040 | 0.29                  | 17.05 | 16.05 | $2.02 \times 10^{-2}$             | $1.89 \times 10^{-1}$ | $1.35 \times 10^{-1}$ | $1.94 \times 10^{-1}$ |
|            | 343                 | 171.5                                         | 180,092       | 363                                  | 8              | 1,650  | 157   | 0.05                  | 1.43  | 5.11  | $3.00 \times 10^{-2}$             | $1.29 \times 10^{-1}$ | $7.45 \times 10^{-2}$ | $2.68 \times 10^{-1}$ |
|            | 2,401               | 1,200.5                                       | 607,696       | 363                                  | 1              | 484    | 33    | $1.00 \times 10^{-6}$ | 0.73  | 1.54  | $2.55 \times 10^{-2}$             | $1.03 \times 10^{-1}$ | $6.56 \times 10^{-2}$ | $3.34 \times 10^{-1}$ |
|            | 16,807              | 8,403.5                                       | 0             | 0                                    | 0              | 0      | 0     | 0                     | 0     | 0     | $7.16 \times 10^{-9}$             | $1.65 \times 10^{-5}$ | $1.10 \times 10^{-6}$ | $3.34 \times 10^{-1}$ |
| Parents    | 7                   | 3.5                                           | 30            | 7                                    | 2,038          | 10,996 | 4,454 | 5.21                  | 25.31 | 15.29 | $4.36 \times 10^{-6}$             | $6.27 \times 10^{-1}$ | $9.45 \times 10^{-3}$ | $9.45 \times 10^{-3}$ |
|            | 49                  | 24.5                                          | 1,905         | 18                                   | 45             | 6,341  | 1,031 | 0.45                  | 17.25 | 3.07  | $5.38 \times 10^{-2}$             | $1.57 \times 10^{-1}$ | $1.07 \times 10^{-1}$ | $1.16 \times 10^{-1}$ |
|            | 343                 | 171.5                                         | 9,914         | 18                                   | 10             | 1,059  | 150   | 0.05                  | 1.43  | 0.38  | $6.03 \times 10^{-2}$             | $1.17 \times 10^{-1}$ | $7.96 \times 10^{-2}$ | $1.96 \times 10^{-1}$ |
|            | 2,401               | 1,200.5                                       | 21,488        | 18                                   | 3              | 329    | 35    | $1.10 \times 10^{-4}$ | 0.17  | 0.06  | $3.42 \times 10^{-2}$             | $6.77 \times 10^{-1}$ | $5.19 \times 10^{-2}$ | $2.48 \times 10^{-1}$ |
|            | 16,807              | 8,403.5                                       | 0             | 0                                    | 0              | 0      | 0     | 0                     | 0     | 0     | $3.52 \times 10^{-10}$            | $1.50 \times 10^{-5}$ | $1.60 \times 10^{-6}$ | $2.48 \times 10^{-1}$ |
